1 **Evaluating public health effects of risk-based travel policy for the**  
2 **COVID-19 epidemic in Scotland**

3 **Authors:** Isobel McLachlan<sup>1,†</sup>, Selene Huntley<sup>1,†</sup>, Kirstin Leslie<sup>1,†</sup>, Jennifer Bishop<sup>1</sup>,  
4 Christopher Redman<sup>1</sup>, Gonzalo Yebra<sup>1</sup>, Sharif Shaaban<sup>1</sup>, Nicolaos Christofidis<sup>1</sup>,  
5 Samantha Lycett<sup>2</sup>, Matthew T.G. Holden<sup>1,4</sup>, David L. Robertson<sup>1,3</sup>, Alison Smith-  
6 Palmer<sup>1,\*</sup>, Joseph Hughes<sup>1,3</sup>, Sema Nickbakhsh<sup>1,5,\*</sup>

7 **Affiliations**

8 <sup>1</sup>Public Health Scotland, Meridian Court, 5 Cadogan Street, Glasgow G2 6QE, United  
9 Kingdom

10 <sup>2</sup>Roslin Institute, Easter Bush Campus, University of Edinburgh, Edinburgh, EH25  
11 9RG, United Kingdom

12 <sup>3</sup>MRC-University of Glasgow Centre for Virus Research, 464 Bearsden Road,  
13 Glasgow, G61 1QH, United Kingdom

14 <sup>4</sup>School of Medicine, University of St Andrews, North Haugh, St Andrews, KY16 9TF,  
15 United Kingdom

16 <sup>5</sup>School of Biodiversity, One Health & Veterinary Medicine, Garscube Campus,  
17 University of Glasgow, Glasgow, G61 1QH, United Kingdom

18 <sup>†</sup>Shared first authors

19 <sup>\*</sup>Corresponding authors: Dr. Sema Nickbakhsh ([sema.nickbakhsh@phs.scot](mailto:sema.nickbakhsh@phs.scot)); Dr.  
20 Alison Smith-Palmer ([alison.smith-palmer@phs.scot](mailto:alison.smith-palmer@phs.scot))

21 **Word count:** 4995 (excluding references, tables, figures)

22 **Abstract**

23 **Background:** Decisions to impose temporary travel measures are less common as  
24 the global epidemiology of COVID-19 evolves. Risk-based travel measures may  
25 avoid the need for a complete travel ban, however evaluations of their effects are  
26 lacking. Here we investigated the public health effects of a temporary traffic light  
27 system introduced in the United Kingdom (UK) in 2021, imposing red-amber-green  
28 (RAG) status based on risk assessment.

29 **Methods:** We analysed data on international flight passengers arriving into Scotland,  
30 COVID-19 testing surveillance, and SARS-CoV-2 whole genome sequences to  
31 quantify effects of the traffic light system on (i) international travel frequency, (ii)  
32 travel-related SARS-CoV-2 case importations, (iii) national SARS-CoV-2 case  
33 incidence, and (iv) importation of novel SARS-CoV-2 variants.

34 **Results:** International flight passengers arriving into Scotland had increased by  
35 754% during the traffic light period. Amber list countries were the most frequently  
36 visited and ranked highly for SARS-CoV-2 importations and contribution to national  
37 case incidence. Rates of international travel and associated SARS-CoV-2 cases  
38 varied significantly across age, health board, and deprivation groups. Multivariable  
39 logistic regression revealed SARS-CoV-2 cases detections were less likely among  
40 travellers than non-travellers, although increasing from green-to-amber and amber-  
41 to-red lists. When examined according to travel destination, SARS-CoV-2 importation  
42 risks did not strictly follow RAG designations, and red lists did not prevent  
43 establishment of novel SARS-CoV-2 variants.

44 **Conclusions:** Our findings suggest that country-specific post-arrival screening  
45 undertaken in Scotland did not prohibit the public health impact of COVID-19 in

46 Scotland. Travel rates likely contributed to patterns of high SARS-CoV-2 case  
47 importation and population impact.

#### 48 **Keywords**

49 SARS-CoV-2; variant of concern; surveillance; risk assessment; health policy;  
50 pathogen genomics

#### 51 **Background**

52 On 24<sup>th</sup> March 2020, Scotland with the rest of the United Kingdom (UK) entered a  
53 national lockdown to limit SARS-CoV-2 spread and subsequent COVID-19-  
54 associated hospitalisations. This early period of the pandemic was characterised by  
55 British nationals being advised against all but essential travel (1), alongside  
56 unprecedented border closures implemented increasingly by countries globally (2).  
57 However, prior to implementation of these stringent travel restrictions in the UK,  
58 hundreds of introductions of SARS-CoV-2 into Scotland had already occurred  
59 through international travel and community transmission was underway (3).

60 By July 2020, circulating SARS-CoV-2 was dramatically reduced (4) and Scotland  
61 had moved to Phase 3 of a route map out of lockdown (5). Whilst interventions  
62 focusing on reducing social contacts remained in place, travel restrictions were  
63 relaxed with the lifting of quarantine measures from certain overseas destinations (6).  
64 A country-specific risk assessment approach was subsequently undertaken with the  
65 introduction of 'travel corridors', relaxing self-isolation measures for individuals  
66 travelling to countries not considered to be high risk for high levels of SARS-CoV-2  
67 exposure (7).

68 Progress out of lockdown was short lived however, with increasing COVID-19  
69 incidence linked to travel in the summer of 2020 (4,8) and the subsequent

70 identification of the first novel SARS-CoV-2 Variant of Concern (VOC), Alpha (B.1.1.7  
71 Pango lineage (9)), in Scotland during November 2020, first identified in the UK and  
72 classified VOC based on risk assessment (10). Scotland subsequently entered a  
73 period with travel restrictions enforced at a local authority level based on regional  
74 infection rates, regulating both domestic and international travel, and the country  
75 entered its second national lockdown on 5<sup>th</sup> January 2021. By 4<sup>th</sup> January 2021,  
76 Alpha was the dominant variant circulating in the UK and managing the tradeoff  
77 between COVID-19 hospitalisations and recovery of the economy including the travel  
78 industry was of high concern. Other variants of concern were also identified, such as  
79 Beta (B.1.351) in South Africa, resulting in a long-standing travel ban to this country.

80 Subsequently, in line with the lifting of lockdown restrictions and safe resumption of  
81 international travel, May 2021 marked the introduction of a ‘traffic light system’ across  
82 the UK which applied relaxed quarantine and testing requirements for travellers on a  
83 country-specific basis through Red-Amber-Green (RAG) list designations (11).

84 During this period, the epidemiological course of the epidemic shifted in the UK, with  
85 the importation of a fourth novel VOC, Delta (B.1.617.2; first identified in India)(12),  
86 although widespread rollout of the national COVID-19 vaccination programme was  
87 also in place at this time. Delta replaced Alpha as the dominant variant in Scotland by  
88 the end of May 2021 (13). The traffic light system was subsequently lifted across the  
89 UK on 4<sup>th</sup> October 2021, with Scotland adopting a simplified system of ‘red list’ and  
90 ‘not red’ (14). However, a fifth novel VOC, Omicron (the BA.1 sub-lineage; first  
91 identified in South Africa), was identified in Scotland at the end of November 2021  
92 (15,16). Several countries deemed high risk were given red list status in an attempt  
93 to slow the introduction and spread of Omicron in the UK (17), although this highly  
94 transmissible variant was soon established in the community. Travel regulations were

95 eventually lifted incrementally and fully removed across the UK on 18<sup>th</sup> March 2022  
96 (18).

97 International travel continues to present the main risk pathway for importations of  
98 novel SARS-CoV-2 variants of public health significance. In the UK, a temporary  
99 increase in surveillance was recently reintroduced for individuals travelling from  
100 specific locations, owing to the evolving epidemiological situation of other nations  
101 experiencing increased COVID-19 activity and the emergence of further variants of  
102 potential public health significance (19). There is, however, a need for improved  
103 understanding of how risks of novel SARS-CoV-2 introductions and subsequent  
104 spread vary by the geography and demography of populations, to inform  
105 proportionate travel-related interventions and early warning surveillance systems.  
106 There have been few observational studies providing evidence for the public health  
107 effects of COVID-19 travel restrictions, with the majority focused on border closures  
108 put in place to curb global spread early in the pandemic (2,20,21).

109 Here we use Scottish community surveillance and SARS-CoV-2 whole genome  
110 sequence data to evaluate the public health effects of the COVID-19 traffic light travel  
111 policy in Scotland. Our objectives were to quantify the effect of the traffic light policy  
112 on (i) international travel frequency, (ii) temporal, demographic, and geographic  
113 patterns of SARS-CoV-2 importation risk, and the odds of SARS-CoV-2 case  
114 detections, (iii) national SARS-CoV-2 case incidence, and (iv) the risk of importing  
115 specific SARS-CoV-2 VOC across RAG groups. This evaluation has importance for  
116 providing an evidence-based approach to future public health guidance and decision  
117 making around international travel policy.

## 118 **Methods**

119 Datasets

120 *Civil Aviation Authority data*

121 Data on the monthly number of passenger arrivals into Scottish airports, by country  
122 and airport of origin, were provided by the Civil Aviation Authority (CAA). There were  
123 5,508 records capturing 9,383,947 passengers in total from the period April 2019 to  
124 September 2021, from flights arriving into 11 Scottish airports from 290 airports in 70  
125 countries. Data were grouped providing total monthly numbers of flights into Scottish  
126 airports by country of origin.

127 *COVID-19 Passenger Locator Forms*

128 From June 2020, measures were introduced requiring all UK arrivals to complete a  
129 Passenger Locator Form (PLF) to support compliance with COVID-19 travel  
130 measures (23). The dataset contained weekly data for the period 28<sup>th</sup> June 2020 to  
131 19<sup>th</sup> March 2022 on the number of PLFs submitted to Border Control and the  
132 originating countries from which passengers had travelled from into Scotland. Over  
133 the 90-week period, passengers arrived into Scotland from 247 countries.

134 To enable like-for-like country-level comparison with PCR data, data on the Canary  
135 Islands and Madeira were merged with that of Spain and Portugal respectively in  
136 both the CAA and the PLFs.

137 *COVID-19 microbiological surveillance data: Community cases*

138 Data on SARS-CoV2 infections in Scotland were accessed from the NHS Scotland  
139 Corporate Data Warehouse (CDW), a database designed to support the analysis and  
140 reporting of COVID-19 surveillance in Scotland. The national case definition for a  
141 SARS-CoV-2 infection was applied for the study duration, whereby respiratory

142 specimens testing positive by reverse transcription real-time Polymerase Chain  
143 Reaction (PCR) or Lateral Flow Device (LFD) tests 90 days or more after an  
144 individual's last positive specimen were captured as a separate episode of infection  
145 (reinfection). The dataset captured demographics (age, sex, postcode location) and  
146 test information (date of sample and test result). Reasons for testing included  
147 diagnostic confirmation for those with symptoms, asymptomatic testing of close  
148 contacts to support self-isolation, and workplace testing as part of the NHS Test &  
149 Protect system.

150 There were 1,356,983 case records for the study period of 15<sup>th</sup> February 2021 to 3<sup>rd</sup>  
151 May 2022. This period spanned the introduction of post-arrival tests for travellers  
152 returning from international destinations to a period post-lifting of travel restrictions.

153 *COVID-19 microbiological surveillance data: Traveller tests*

154 The CDW database captured post-arrival travel-related tests from 15<sup>th</sup> February  
155 2021. During the traffic light period, tests were taken on or before day 2 (red, amber  
156 and green list countries) and on or after day 8 (red and amber list countries).

157 Individuals were required to self-report the main country they travelled to when  
158 booking a COVID-19 test if they had travelled internationally within the preceding 14  
159 days. All individuals were required to take pre-departure tests until this requirement  
160 was incrementally removed from 7<sup>th</sup> January 2022.

161 There were 425,764 SARS-CoV-2 PCR test records from individuals reporting recent  
162 international travel over the study period. Deduplication of SARS-CoV-2 tests was  
163 conducted by grouping multiple tests based on a unique identifier (Community Health  
164 Index) for individuals with specimen dates falling within a 14-day period and relating  
165 to the same travel destination, thereby defining travel events by country. Following

166 this process, 345,045 travel records remained representing 290,044 individuals. Over  
167 the study period, 41,934 (14.5%) of individuals had more than one travel event, with  
168 a minority of individuals (n=1,178, 0.4%) reporting travel to more than one country  
169 within a 14-day period. Tests with specimen dates out with a 90-day period were  
170 deemed a separate episode of infection (following the national case definition (24)).  
171 Positive test records were preferentially retained over negative records for each  
172 travel event. Monthly PCR test frequencies for travellers were strongly correlated with  
173 numbers of passengers into Scotland based on PLFs (Figure S1, Supplementary  
174 Material).

175 *COVID-19 microbiological surveillance data: Case-control analysis*

176 Logistic regression modelling was employed to assess the relative odds of SARS-  
177 CoV-2 case detection between international travellers and non-travellers. For this  
178 analysis, PCR tests were extracted for the traffic light period (17<sup>th</sup> May 2021 to 30<sup>th</sup>  
179 September 2021). There were 184,126 deduplicated travel records for this time  
180 period, and among 183,839 with the information, 1.9% had self-reported symptoms.

181 Non-travel records (n=4,011,152) were deduplicated as for the travel records. Those  
182 with specimen dates out with 90 days of the first identified records were presumed a  
183 separate episode of infection, retaining a single record per episode. Positive test  
184 results were retained over negative test results. Test records without a unique  
185 identifier were assumed to be from different individuals. Following deduplication,  
186 there were 1,891,873 non-travel records during the traffic light period and among  
187 1,499,890 tests with the information, 43.3% had self-reported symptoms.

188 *SARS-CoV-2 whole genome sequencing data*



189 Whole Genome Sequencing (WGS) of SARS-CoV-2 samples was introduced in  
190 Scotland in March 2020. Following emergence of the Alpha variant, a push to  
191 sequence all positive SARS-CoV-2 samples was stepped up to allow for surveillance  
192 of variants, though with prioritisation toward travel-related samples to identify  
193 importation of VOC. WGS results were uploaded by sequencing labs and quality  
194 assessed via the COVID-19 Genomics UK (COG-UK) pipeline hosted on the Cloud  
195 Infrastructure for Microbial Bioinformatics (CLIMB) as part of COVID-19 Genomics  
196 UK (COG-UK)(25). Definitions based on mutational patterns were then applied to  
197 resultant genomic information to designate a variant (9) and these results were linked  
198 to the original PCR test via a unique specimen identifier.

199 During the study period there were 317,570 samples from COVID-19 cases resident  
200 in Scotland that underwent SARS-CoV-2 whole genome sequencing. Samples which  
201 had a low-quality genome and samples that could not be linked to a positive SARS-  
202 CoV-2 PCR test, and therefore could not be confirmed as a Scottish sample, were  
203 excluded (n=78).

#### 204 *Traffic light system country designations*

205 The Red-Amber-Green (RAG) status of each travel destination was extracted from  
206 Scottish Government online travel updates (18). Test records, including genome  
207 sequences, were linked to RAG status based on the recorded travel destination and  
208 the specimen date of the test. Analyses aggregating data on a weekly basis applied  
209 the country's RAG status pertaining to the start of each week, all other analyses  
210 applied the daily designations.

#### 211 Statistical analysis

##### 212 *Assessment of travel patterns by time, location and demography*

213 Descriptive statistical analyses were performed to characterise key trends of  
214 international travel for the Scottish population before and during the pandemic, based  
215 on CAA and PLF data. Changes in the count of passengers entering Scotland, at or  
216 between key time points, was used as an objective indicator of the impact of travel-  
217 related measures on travel.

218 To assess the impact of the traffic light system on the risk of SARS-CoV-2  
219 importations, trends in the weekly numbers and proportions of PCR-positive  
220 travellers were examined for the top 30 most frequently visited travel destinations,  
221 spanning a period before (February-May 2021), during (May 2021-October 2021),  
222 and after (October 2021-May 2022) the traffic light system. Although post-arrival tests  
223 were a mandatory travel policy, some exceptions were in place and compliance is not  
224 quantified (23). PLF data were therefore used to assess how representative the PCR  
225 test data was of travel frequency by destination during the traffic light period.

226 Groups at risk of importing SARS-CoV-2 through international travel were also  
227 assessed by comparing travel frequencies across demographic (age, sex, relative  
228 deprivation of residential location, as measured by the Scottish Index of Multiple  
229 Deprivation; SIMD) and geographical (territorial NHS Board) factors. An ANOVA test  
230 was used to assess differences in mean travel frequencies across demographic and  
231 geographic groups, with a p-value <0.05 applied to indicate statistical significance.

232 The potential impact of travel on the epidemiological situation in Scotland was  
233 assessed by quantifying the numbers of travel-related SARS-CoV-2 cases as a  
234 proportion of all Scottish SARS-CoV-2 cases. Ranking of travel destinations  
235 according to travel frequency, importation risk, and impact gave an overall

236 assessment of risk, shown for a period of low (June 2021) and high (September  
237 2021) travel frequency.

### 238 *Logistic regression modelling*

239 SARS-CoV-2 tests were extracted and deduplicated across travellers (with a recent  
240 travel event) and non-travellers (records with no recent travel event) for calendar  
241 months spanning the period of the traffic light system (17<sup>th</sup> May 2021 and 30<sup>th</sup>  
242 September 2021 inclusive).

243 The combined dataset was linked to the RAG status according to the travel  
244 destination of each record. A 'travel status' variable was created whereby those with  
245 an international travel event were grouped by level of RAG status and with the  
246 remaining forming a 'non-traveller' group.

247 Statistical analyses were performed to assess the association between travel status  
248 and the odds of detecting a SARS-CoV-2 case in a test-negative case-control design,  
249 adjusting for demographic, geographic and temporal factors. Unadjusted odds ratios  
250 were initially quantified in univariate binary logistic regression models examining  
251 associations between SARS-CoV-2 infection and travel status, age group (0-19y, 20-  
252 39y, 40-59y, 60-79y, 80y+), sex (male versus female), month (May, June, July,  
253 August, September) and NHS Board (fourteen territorial health boards).

254 Multivariable mixed-effects logistic regression modelling was then used to quantify  
255 the relative odds of SARS-CoV-2 case detection adjusting for age group, sex, and  
256 calendar month as fixed effects and NHS Board location as a random effect.

257 Statistical interactions were assessed for all factors that were significant in the final  
258 multivariable model, with a p-value less than 0.05 indicating statistical significance. A  
259 small number of individuals (n=8990, 0.4%) had duplicate records (positive and/or

260 negative tests). Restricting analyses to the first observed records per individual did  
261 not alter the magnitude, direction or significance of the estimated odds ratios.

262 All analyses were performed in R v3.6.1 (26). The glm function was applied for single  
263 effect statistical models and the lme4 (1.1-27.1 package) for mixed-effect models.

## 264 **Results**

### 265 **Impact of COVID-19 policies on patterns of international travel in Scotland**

266 Prior to the COVID-19 pandemic, numbers of international flight passengers arriving  
267 into Scotland per month were estimated to range from around 445,000 passengers  
268 (February 2019) to 952,000 (July 2019) during the peak summer period (CAA data,  
269 see Figure 1). During the COVID-19 pandemic, monthly numbers of international  
270 flight passengers decreased substantially owing to travel restrictions (Figure 1). A  
271 reduction in travel of 97.7% (to around 17 thousand passengers per month,  
272 compared to the same period in 2019) was observed during the first national  
273 lockdown (April to May, 2020), by 86.7% (to around 95 thousand passengers per  
274 month, compared to same period in 2019) during a period of relaxed travel  
275 restrictions (data from July 2020 to January, 2021), and by 87.4% (to around 111  
276 thousand passengers per month, compared to the same period in 2019) during the  
277 period of the traffic light system (May to September 2021).

278 The magnitude of reduced international travel across the phases of COVID-19 travel  
279 restrictions was largely consistent across destinations and data sources (Figure S2,  
280 Supplementary Material). Despite large reductions in travel, the most frequently  
281 visited destinations remained largely consistent however, with Spain the most  
282 common destination both prior to and during the COVID-19 pandemic (Figure 2).

283 The traffic light system (17<sup>th</sup> May 2021 to 4<sup>th</sup> October 2021) followed a country-  
284 specific risk-based approach (see Figure S3, Supplementary Material), with  
285 quarantine reserved for high-risk countries (red list), and others requiring self-  
286 isolation together with day 2 and 8 post arrival tests (amber list), or day-8 post-arrival  
287 tests only (green list). The frequency of international arrivals into Scottish airports  
288 subsequently increased by 754% from May 2021 to September 2021, compared with  
289 a 12% increase over the same period in 2019 (Figure 2).

290 The ranking of travel frequency across RAG groups remained consistent over time  
291 when retrospectively applying designations to the pre-pandemic period, with amber  
292 list countries the most frequently visited (83.8% and 70.0% in the pandemic period  
293 based on PLF and CAA data sources respectively, and 74.8% pre-pandemic (CAA  
294 data)). A small discrepancy was seen between red and green list countries although  
295 they were largely consistent throughout the traffic light period (Figure S3,  
296 Supplementary Material). The largest decrease in travel frequency, comparing May-  
297 to-September inclusive pre-and-post pandemic, was seen for red list (87.7%  
298 decrease) followed by amber (78.8% decrease) and green list (63.2% decrease)  
299 countries (Figure S2, Supplementary Material).

300 Despite the lifting of the traffic light system and incremental removal of travel  
301 restrictions in winter 2021/22, the frequency of international travel declined during  
302 this period consistent with the typical seasonality of travel (Figure 1).

### 303 **Travel and case patterns by demographic and geographic groups**

304 A significant difference in average weekly rates of travel was found by age group,  
305 deprivation, and NHS Board, but not for sex, with a similar pattern observed for  
306 SARS-CoV-2 detection rates among travellers (Table 1). Both travel and SARS-CoV-

307 2 case detection rates were notably higher in working aged adults (age groups 20-  
308 39y and 40-59y), for residents of NHS Boards with larger populations, and increased  
309 with decreasing deprivation (over half of all travel events were from individuals  
310 residing in the lowest deprivation groups).

311 However, some variation was seen, with younger (20-29y) working aged females and  
312 older (30-39y and 50-59y) working aged males having the greatest travel frequencies  
313 (Figure S4a), and a relatively high proportion of travellers resided in high deprivation  
314 (low SIMD score) locations for specific destinations (Figure S4b). Despite the  
315 temporal variation, differences across NHS Boards showed general consistency with  
316 more populous regions tending to have higher travel rates (Figure S4c).

317 **Risks and population impact of SARS-CoV-2 importations through international**  
318 **travel during the period of the traffic light system**

319 Figure 3 summarises weekly numbers of tests and travel-related SARS-CoV-2 cases  
320 for each of the top 30 most frequently visited travel destinations. Overall, there was a  
321 324% increase in SARS-CoV-2 cases comparing the weeks with the highest travel  
322 frequency in the pre-traffic light (w/c 5<sup>th</sup> April 2021) and traffic light (w/c 13<sup>th</sup>  
323 September 2021) periods. For some countries, periods of increasing case numbers  
324 appeared to coincide with increasing travel frequency. However, in other instances,  
325 increasing case numbers appeared decoupled from travel frequency and instead  
326 appeared to be explained by SARS-CoV-2 importation risk (the proportion of traveller  
327 PCR tests with a positive result).

328 Figure 4 summarises the rankings of the top 30 most frequently visited countries  
329 according to travel frequency, SARS-CoV-2 importation risk, and population impact  
330 (as measured by the proportion of all Scottish SARS-CoV-2-positive PCR tests with

331 an associated travel event). Countries ranking high across each metric represented  
332 the greatest risk when combining exposure and consequence. Notably, four red list  
333 countries appeared in the top seven, and two in the top three, ranking of SARS-CoV-  
334 2 importation risks during the lowest (June) and highest (September) travel frequency  
335 periods respectively. However, one green list country had the highest combined  
336 ranking across all metrics during June, and by September there was no discernible  
337 pattern of risk distinguishing green and amber list destinations.

338 Overall, the rate of SARS-CoV-2 cases detections was estimated to be 17 per 1,000  
339 among those with an international travel event, compared to 190 per 1,000 among  
340 those without an international travel event over the same period. Employing  
341 multivariable mixed-effects logistic regression, the odds of detecting SARS-CoV-2  
342 cases increased from green-to-amber and amber-to-red list countries but was lower  
343 for travellers relative to the non-traveller PCR-tested community. This finding was  
344 consistent regardless of RAG group, controlling for age group, sex, month and  
345 geographical location (see Table 2 for details). Some variation in the effect of travel  
346 status was found according to age group, sex, and month, however the relative odds  
347 of case detection was consistently greater among those with no recorded recent  
348 international travel event.

349 Several demographic factors were identified as independently associated with the  
350 odds of detecting SARS-CoV-2, regardless of travel status, with cases more likely  
351 detected among 0-19y olds relative to 20-39y olds, among males relative to females,  
352 and among individuals' resident in more deprived areas. These predictors of SARS-  
353 CoV-2 cases differed from that observed among travellers (as highlighted also by  
354 differences in the modelled predicted probabilities when comparing traveller and non-  
355 traveller groups; results not shown) and the patterns of travel frequency.

356 **Risks and population impact of SARS-CoV-2 novel variant importations**  
357 **through international travel during the period of the traffic light system**

358 Figure 5 shows the weekly numbers of sequenced SARS-CoV-2 cases by variant  
359 group against a timeline of travel policy changes. For most travel destinations and  
360 periods of the epidemic, the most likely imported VOC reflected the dominant variant  
361 circulating in the UK representing 50% or more of sequenced cases (Figure S5,  
362 Supplementary Material). However, some variation in the risk of VOC importation  
363 was observed across travel destinations, particularly during the period of Alpha  
364 variant dominance albeit based on small numbers of sequenced cases.

365 The Delta variant was identified in Scotland on 4<sup>th</sup> April 2021 before the relaxation of  
366 travel restrictions for some destinations through the traffic light system. Figure 6  
367 compares weekly numbers of variants identified among sequenced SARS-CoV-2  
368 cases returning from non-red and red-list travel destinations, alongside non-traveller  
369 community cases during the period in which Delta emerged. Although several  
370 countries were added to the red list from 9<sup>th</sup> April 2021, Delta was primarily detected  
371 among travellers returning from non-red list countries (except for a short period from  
372 late April to end of May). Community transmission was evident from late-April,  
373 following which Delta was relatively more frequently identified among non-travellers.  
374 Delta replaced Alpha to become the dominant variant in Scotland from 19<sup>th</sup> May 2021  
375 (Figure S6, Supplementary Material).

376 Shortly after the traffic light system was removed on 4<sup>th</sup> October 2021, Omicron  
377 (BA.1 sublineage), emerged with the specimen of the first known case in Scotland  
378 dated 22<sup>nd</sup> October 2021 (Figure S6, Supplementary Material). In contrast to Delta,  
379 Omicron was first identified in the community among non-travel-related cases (Figure



380 7), with only 2.6% of sequenced Omicron cases associated with recent international  
381 travel compared to 22.1% of Delta cases in the first four weeks of their respective  
382 emergence. Overall, both Delta and Omicron were more frequently detected among  
383 non-travellers and similarly to Delta, detection frequency for Omicron was higher in  
384 those returning from non-red list than red list countries.

## 385 **Discussion**

386 With the ongoing generation of novel variants able to infect vaccinated and  
387 previously infected individuals, SARS-CoV-2 can be expected to persist globally with  
388 continued spread of novel variants of public health significance. While acquired  
389 immunity either from prior waves of infection or from vaccines are now mediating  
390 disease severity in most cases of infection, the future evolution of SARS-CoV-2  
391 remains unpredictable. In the event of a new VOC emerging, border closures may  
392 provide a means for reducing the numbers of imported cases and control the  
393 progression of outbreaks locally. However, it is well recognised that unless  
394 implemented rapidly and informed by the true risks, the public health benefit is  
395 limited.

396 Once community transmission has been established, risk-based quarantine and post-  
397 travel screening may be proportionate measures to reduce the public health  
398 consequences of international travel. Risk-based screening measures have recently  
399 been reintroduced by several nations, including the UK, owing to increasing global  
400 COVID-19 spread (19). However, there is a lack of understanding of travel policy  
401 effectiveness pre-dating COVID-19, including for pandemic influenza and other  
402 emerging infectious diseases (27,28). Most studies assessing the public health  
403 effects of COVID-19 travel-related policies have used modelling approaches in the

404 absence of empirical data, and have focused on the early phase of the pandemic  
405 when reduced international travel was of paramount interest to curb the global  
406 spread of disease (2,20,21,29,30). One study suggests the quarantine of  
407 symptomatic COVID-19 cases is insufficient to significantly delay the onset of an  
408 epidemic (31).

409 The traffic light system employed in the UK during May to October 2021 aimed to  
410 provide a risk-based approach to targeting quarantine and screening measures for  
411 travellers returning from specific destinations. To our knowledge, our study is the first  
412 to evaluate the potential public health effects of this measure. Firstly, our study  
413 shows, as expected, that international travel increased substantially during the period  
414 of the traffic light system. The highest travel rates were seen for working aged adults,  
415 and those resident in more populous health boards and in low deprivation areas. The  
416 ability to characterise patterns of travel may have implications for targeting safe travel  
417 messaging in the prevention of future VOC importations.

418 Secondly, travel was most frequent to amber list countries during the traffic light  
419 period despite the mandatory requirement for self-isolation. This finding was  
420 corroborated across PLF and CAA datasets despite known limitations, with the  
421 former involving self-submitted information and therefore reliant on compliance, and  
422 with the latter expected to have comparatively underrepresented travel from  
423 countries with few or no direct flights into Scotland but overrepresented travel from  
424 airports operating as central hubs.

425 Thirdly, there were significant differences in the rates of SARS-CoV-2 infections  
426 detected amongst travellers across age groups and deprivation, but not for sex,  
427 aligning with patterns of travel frequency. However, cases of SARS-CoV-2 were

428 more likely detected among non-travellers than travellers overall during the traffic  
429 light period, and the relative odds of detecting cases differed from the pattern of  
430 cases observed among travellers. Overall these findings highlight the complexity in  
431 understanding predictors of case detections that are specific to travellers, but that  
432 patterns of travel may be a good proxy indicator of this.

433 The likelihood of detecting a SARS-CoV-2 infection among travellers increased from  
434 green-to-amber-to-red list countries, although with some variation when examining  
435 individual travel destinations. The highest frequency of travel was seen for an amber  
436 list country, resulting in relatively high numbers of imported SARS-CoV-2 cases when  
437 coupled with importation risk (proportion of travellers testing positive) together with a  
438 high population impact (proportion of Scottish SARS-CoV-2 cases attributed to  
439 travel). However, our study shows that despite fewer travel events, the highest  
440 SARS-CoV-2 importation risk was associated with a green list country in June 2021.  
441 Furthermore, by September 2021, a number of green list countries ranked higher  
442 than red list countries for population impact, highlighting the complexity of  
443 proportionate applications of RAG systems. We note however that our study does not  
444 assess the impact of quarantine and isolation measures in place for those returning  
445 from red and amber list countries which is expected to have reduced the population  
446 impact of international travel. Travel frequency and the context of existing community  
447 circulation are key factors affecting the public health effects of international travel,  
448 along with the epidemiological situation of the travel destination. Identifying specific  
449 countries as high risk without considering the speed of spread of SARS-CoV-2  
450 variants to other regions internationally, coupled with large differences in international  
451 surveillance efforts, will severely limit the effect of a traffic-light system.

452 Finally, our study spanned two novel SARS-CoV-2 variant introductions. Stringent  
453 travel restrictions did not prevent the introduction of Delta into the UK, whilst the risk-  
454 based red list policy did not prevent establishment in the community once  
455 introductions had occurred. However, decreased case numbers were observed for  
456 some red list countries during the Delta wave despite a high SARS-CoV-2  
457 importation risk, likely owing to decreased travel to these destinations. The rapidity  
458 by which community transmission was established in the case of Omicron, with most  
459 initial cases detected among non-travellers, suggests the direct impact of travel to  
460 red list countries during this period was likely minimal, especially given the  
461 requirement for quarantine. It was not possible however to assess the impact of the  
462 evolving epidemiological situation in red list countries and degree of global spread on  
463 the risks of Omicron variant importations from amber and green lists countries.

464 Our study has a number of limitations. Firstly, laboratory surveillance data may not  
465 capture all travellers; an unknown number of individuals were exempt from testing  
466 and compliance is not quantifiable. Secondly, deductions of SARS-CoV-2 infection  
467 risks across traveller and non-traveller groups must be made with caution. The  
468 greater odds of detecting SARS-CoV-2 cases in the non-traveller group may be  
469 explained by the targeted testing of symptomatics and known close contacts of  
470 confirmed cases.

471 Furthermore, those entering the UK were required to take a pre-departure test during  
472 the traffic light period, so the proportion of cases in this group is expected to reflect  
473 the risk of SARS-CoV-2 importation - combining the risks of a travel-associated  
474 infection and testing negative prior to departure. This should not preclude the validity  
475 of comparing SARS-CoV-2 case frequency over time, by travel destination, and  
476 across demographic and geographic groups. Thirdly, case misclassifications may

477 have arisen, with some over-ascription of infections to the period of international  
478 travel (the acquisition of infection before or after travel cannot be ruled out, including  
479 from household transmission). Fourthly, in the absence of a suitable control  
480 population or period, our study did not assess the reduction in SARS-CoV-2 case  
481 incidence in Scotland attributable to the traffic light system.

## 482 **Conclusions**

483 Our findings show that risk-based post-arrival screening undertaken in Scotland did  
484 not in practice prohibit the importation of SARS-CoV-2 cases, or the establishment of  
485 SARS-CoV-2 VOC in the Scottish community, arising through international travel.  
486 Overall SARS-CoV-2 case importation risks did not strictly follow RAG designations.  
487 This is likely explained by travel frequency, regardless of country risk status, coupled  
488 with rapid global spread and local community transmission limiting the value of red  
489 lists to control VOC importations and population impact. Our study provides valuable  
490 learnings that may support decision making in Scotland during any future emergency  
491 response for COVID-19 or pandemics. These lessons may be of relevance to other  
492 nations and infectious diseases although differences in the epidemiology, disease  
493 surveillance systems, and travel policy implementations should be borne in mind.  
494 While it is clear that risk-based travel restrictions may have limited value in isolation  
495 in the case of a pathogen like SARS-CoV-2, which has the potential to spread  
496 rapidly, they could potentially work more effectively if international variant  
497 surveillance systems were compatible, and with information shared in a timely and  
498 open manner, to rapidly detect and respond to new variants as they arise.

499

500

501

502 **Declarations**

503

504 **Ethics approval and consent to participate**

505 This study was undertaken as part of public health surveillance activity within the  
506 COVID-19 programme of Public Health Scotland, in line with the necessary  
507 associated regulations and guidelines. The retention and processing of information  
508 on individuals is conducted by Public Health Scotland as part of COVID-19  
509 surveillance in Scotland in the context of emergency data processing  
510 (<https://www.informationgovernance.scot.nhs.uk/covid-19-privacy-statement/>),  
511 including the Civil Contingencies Act 2004, the NHS (Scotland) Act 1978 and the  
512 Public Health (Scotland) Act 2008, and under Articles 6(1)(e), 9(2)(h), 9(2)(i), 9(2)(j)  
513 of the General Data Protection Regulation. Surveillance data was shared with NHS  
514 Scotland according to the Intra NHS Scotland Data Sharing Accord  
515 ([https://www.informationgovernance.scot.nhs.uk/wp-content/uploads/2020/06/2020-  
516 06-17-Intra-NHS-Scotland-Sharing-Accord-v2.0.pdf](https://www.informationgovernance.scot.nhs.uk/wp-content/uploads/2020/06/2020-06-17-Intra-NHS-Scotland-Sharing-Accord-v2.0.pdf)). Ethics approval and informed  
517 consent was not required for this work which was based on pre-existing infectious  
518 disease surveillance data for the Scottish population. The access and processing of  
519 individual-level data was conducted under standard Data Protection Impact  
520 Assessment information governance approval. Individual-level records were de-  
521 identified before being accessed and analysed by the project team.

522 **Consent for publication**

523 Not applicable.

524 **Availability of data and materials**

525 The healthcare data used in this study are available upon application to the NHS  
526 Scotland Public Benefit and Privacy Panel For Health and Social Care: [Public Benefit  
527 and Privacy Panel for Health and Social Care \(scot.nhs.uk\)](https://www.scot.nhs.uk/public-benefit-and-privacy-panel-for-health-and-social-care/). International flight data  
528 may be sourced from the Civil Aviation Authority (<https://www.caa.co.uk/home/>); see  
529 also: [https://www.caa.co.uk/data-and-analysis/uk-aviation-market/airports/uk-airport-  
530 data/](https://www.caa.co.uk/data-and-analysis/uk-aviation-market/airports/uk-airport-data/).

### 531 **Competing interests**

532 The author(s) declare no competing interests.

### 533 **Funding**

534 This work was supported by the Chief Scientist Office Response Mode funding  
535 [HIPS/21/63]. The MRC-University of Glasgow authors are supported by the Medical  
536 Research Council [MC\_UU\_12014/12].

### 537 **Authors' contributions**

538 SL, MTG, DLR, ASP, JH and SN conceived the study and acquired funding. IM, SH,  
539 KL, SL, JH and SN designed the analyses. JB performed data extractions and  
540 processing. IM, SH, KL, GY, SS and NC performed data curation. IM, SH, and KL  
541 performed analyses. MH, DLR, ASP, JH and SN coordinated data generation. SN  
542 coordinated and supervised analyses and the study team. All authors interpreted  
543 data. IM, SH, KL and SN wrote the first draft of the manuscript. All authors  
544 contributed to and approved the final version.

### 545 **Acknowledgments**

546 We thank the Bioinformatics, COVID-19 Surveillance, and Travel Health teams at  
547 Public Health Scotland who developed and managed the surveillance infrastructure

548 and data sharing that enabled this study as part of the COVID-19 response in  
549 Scotland. We also thank the Civil Aviation Authority, in particular Kit Beynon, for  
550 providing the data analysed in our study and for their helpful comments. We also  
551 thank Jim McMenamin for a helpful critique of the manuscript. The SARS-CoV-2  
552 genomics data was initially generated through a network of laboratories as part of the  
553 COVID-19 Genomics UK Consortium ([COVID-19 Genomics UK Consortium](https://cogconsortium.uk)  
554 [\(\[cogconsortium.uk\]\(https://cogconsortium.uk\)\)](https://cogconsortium.uk)) and then by the NHS Sequencing Service in Scotland ([COVID-  
555 19 Whole Genome Sequencing \(WGS\) - Public health microbiology - Services -  
556 Public Health Scotland](https://www.nhs.uk/health-scotland/19-whole-genome-sequencing-wgs-public-health-microbiology-services-public-health-scotland)).

## 557 **References**

- 558 1. Coronavirus (COVID-19) update: First Minister's speech 24 March 2020 -  
559 gov.scot [Internet]. [cited 2022 Oct 7]. Available from:  
560 <https://www.gov.scot/publications/first-ministers-update-covid-19/>
- 561 2. Bou-Karroum L, Khabisa J, Jabbour M, Hilal N, Haidar Z, Abi Khalil P, et al.  
562 Public health effects of travel-related policies on the COVID-19 pandemic: A  
563 mixed-methods systematic review. *J Infect.* 2021 Oct;83(4):413–423.
- 564 3. da Silva Filipe A, Shepherd JG, Williams T, Hughes J, Aranday-Cortes E,  
565 Asamaphan P, et al. Genomic epidemiology reveals multiple introductions of  
566 SARS-CoV-2 from mainland Europe into Scotland. *Nat Microbiol.* 2021  
567 Jan;6(1):112–122.
- 568 4. Lycett SJ, Hughes J, McHugh MP, Filipe ADS, Dewar R, Lu L, et al. Epidemic  
569 waves of COVID-19 in Scotland: a genomic perspective on the impact of the  
570 introduction and relaxation of lockdown on SARS-CoV-2. *medRxiv.* 2021 Jan  
571 20;
- 572 5. Coronavirus (COVID-19) Phase 3: Scotland's route map update - 9 July 2020 -  
573 gov.scot [Internet]. [cited 2021 Oct 10]. Available from:  
574 [https://www.gov.scot/publications/coronavirus-covid-19-framework-decision-  
575 making-scotlands-route-map-through-out-crisis-phase-3-update/](https://www.gov.scot/publications/coronavirus-covid-19-framework-decision-making-scotlands-route-map-through-out-crisis-phase-3-update/)
- 576 6. Quarantine rule ends for travellers arriving from lower risk countries and  
577 territories - gov.scot [Internet]. [cited 2022 Oct 6]. Available from:  
578 [https://www.gov.scot/news/quarantine-rule-ends-for-travellers-arriving-from-  
579 lower-risk-countries-and-territories/](https://www.gov.scot/news/quarantine-rule-ends-for-travellers-arriving-from-lower-risk-countries-and-territories/)
- 580 7. [Withdrawn] COVID-19 risk assessment methodology for inbound international  
581 travel - GOV.UK [Internet]. [cited 2022 Nov 28]. Available from:



- 582 [https://www.gov.uk/government/publications/covid-19-risk-assessment-](https://www.gov.uk/government/publications/covid-19-risk-assessment-methodology-for-inbound-international-travel/covid-19-risk-assessment-methodology-for-inbound-international-travel)  
583 [methodology-for-inbound-international-travel/covid-19-risk-assessment-](https://www.gov.uk/government/publications/covid-19-risk-assessment-methodology-for-inbound-international-travel/covid-19-risk-assessment-methodology-for-inbound-international-travel)  
584 [methodology-for-inbound-international-travel](https://www.gov.uk/government/publications/covid-19-risk-assessment-methodology-for-inbound-international-travel/covid-19-risk-assessment-methodology-for-inbound-international-travel)
- 585 8. Hodcroft EB, Zuber M, Nadeau S, Vaughan TG, Crawford KHD, Althaus CL, et  
586 al. Spread of a SARS-CoV-2 variant through Europe in the summer of 2020.  
587 *Nature*. 2021 Jul;595(7869):707–712.
- 588 9. O’Toole Á, Scher E, Underwood A, Jackson B, Hill V, McCrone JT, et al.  
589 Assignment of epidemiological lineages in an emerging pandemic using the  
590 pangolin tool. *Virus Evol*. 2021 Jul 30;7(2):veab064.
- 591 10. Hill V, Du Plessis L, Peacock TP, Aggarwal D, Colquhoun R, Carabelli AM, et  
592 al. The origins and molecular evolution of SARS-CoV-2 lineage B.1.1.7 in the  
593 UK. *Virus Evol*. 2022 Aug 26;8(2):veac080.
- 594 11. Traffic light system: safe return to international travel - GOV.UK [Internet]. [cited  
595 2022 Nov 28]. Available from: [https://www.gov.uk/government/speeches/traffic-](https://www.gov.uk/government/speeches/traffic-light-system-safe-return-to-international-travel)  
596 [light-system-safe-return-to-international-travel](https://www.gov.uk/government/speeches/traffic-light-system-safe-return-to-international-travel)
- 597 12. McCrone JT, Hill V, Bajaj S, Pena RE, Lambert BC, Inward R, et al. Context-  
598 specific emergence and growth of the SARS-CoV-2 Delta variant. *Nature*. 2022  
599 Oct;610(7930):154–160.
- 600 13. Tracking the Delta variant in Scotland - Our blog - Public Health Scotland  
601 [Internet]. [cited 2022 Oct 6]. Available from:  
602 [https://www.publichealthscotland.scot/our-blog/2021/november/tracking-the-](https://www.publichealthscotland.scot/our-blog/2021/november/tracking-the-delta-variant-in-scotland/)  
603 [delta-variant-in-scotland/](https://www.publichealthscotland.scot/our-blog/2021/november/tracking-the-delta-variant-in-scotland/)
- 604 14. Summary of updates to international travel, October 2021 - GOV.UK [Internet].  
605 [cited 2022 Oct 11]. Available from:  
606 [https://www.gov.uk/government/speeches/summary-of-updates-to-international-](https://www.gov.uk/government/speeches/summary-of-updates-to-international-travel-october-2021)  
607 [travel-october-2021](https://www.gov.uk/government/speeches/summary-of-updates-to-international-travel-october-2021)
- 608 15. Coronavirus (COVID-19): Omicron in Scotland - evidence paper - gov.scot  
609 [Internet]. [cited 2022 Oct 6]. Available from:  
610 <https://www.gov.scot/publications/omicron-scotland-evidence-paper/>
- 611 16. Willett BJ, Grove J, MacLean OA, Wilkie C, De Lorenzo G, Furnon W, et al.  
612 SARS-CoV-2 Omicron is an immune escape variant with an altered cell entry  
613 pathway. *Nat Microbiol*. 2022 Aug;7(8):1161–1179.
- 614 17. 6 African countries added to red list to protect public health as UK designates  
615 new variant under investigation - GOV.UK [Internet]. [cited 2023 Jan 6].  
616 Available from: [https://www.gov.uk/government/news/six-african-countries-](https://www.gov.uk/government/news/six-african-countries-added-to-red-list-to-protect-public-health-as-uk-designates-new-variant-under-investigation)  
617 [added-to-red-list-to-protect-public-health-as-uk-designates-new-variant-under-](https://www.gov.uk/government/news/six-african-countries-added-to-red-list-to-protect-public-health-as-uk-designates-new-variant-under-investigation)  
618 [investigation](https://www.gov.uk/government/news/six-african-countries-added-to-red-list-to-protect-public-health-as-uk-designates-new-variant-under-investigation)
- 619 18. Coronavirus (COVID-19): international travel - gov.scot [Internet]. [cited 2022  
620 Oct 6]. Available from: [https://www.gov.scot/publications/coronavirus-covid-19-](https://www.gov.scot/publications/coronavirus-covid-19-international-travel-quarantine/)  
621 [international-travel-quarantine/](https://www.gov.scot/publications/coronavirus-covid-19-international-travel-quarantine/)

- 622 19. Precautionary and temporary measures introduced to improve COVID  
623 surveillance from China - GOV.UK [Internet]. [cited 2023 Jan 5]. Available from:  
624 [https://www.gov.uk/government/news/precautionary-and-temporary-measures-](https://www.gov.uk/government/news/precautionary-and-temporary-measures-introduced-to-improve-covid-surveillance-from-china)  
625 [introduced-to-improve-covid-surveillance-from-china](https://www.gov.uk/government/news/precautionary-and-temporary-measures-introduced-to-improve-covid-surveillance-from-china)
- 626 20. Grépin KA, Ho T-L, Liu Z, Marion S, Piper J, Worsnop CZ, et al. Evidence of the  
627 effectiveness of travel-related measures during the early phase of the COVID-  
628 19 pandemic: a rapid systematic review. *BMJ Glob Health*. 2021 Mar;6(3).
- 629 21. Burns J, Movsisyan A, Stratil JM, Coenen M, Emmert-Fees KMF, Geffert K, et  
630 al. Travel-related control measures to contain the COVID-19 pandemic: a rapid  
631 review (Review). *Cochrane Database Syst Rev*. 2020;(9).
- 632 22. UK Civil Aviation Authority. Data and analysis | Civil Aviation Authority [Internet].  
633 [cited 2023 Jan 5]. Available from: <https://www.caa.co.uk/Data-and-analysis/>
- 634 23. Managing cross-border travel during the COVID-19 pandemic - National Audit  
635 Office (NAO) Report [Internet]. [cited 2022 May 3]. Available from:  
636 [https://www.nao.org.uk/report/managing-cross-border-travel-during-the-covid-](https://www.nao.org.uk/report/managing-cross-border-travel-during-the-covid-19-pandemic/)  
637 [19-pandemic/](https://www.nao.org.uk/report/managing-cross-border-travel-during-the-covid-19-pandemic/)
- 638 24. COVID-19 reporting to include further data on reinfections - News - Public  
639 Health Scotland [Internet]. [cited 2023 Jan 10]. Available from:  
640 [https://publichealthscotland.scot/news/2022/february/covid-19-reporting-to-](https://publichealthscotland.scot/news/2022/february/covid-19-reporting-to-include-further-data-on-reinfections/)  
641 [include-further-data-on-reinfections/](https://publichealthscotland.scot/news/2022/february/covid-19-reporting-to-include-further-data-on-reinfections/)
- 642 25. Nicholls SM, Poplawski R, Bull MJ, Underwood A, Chapman M, Abu-Dahab K,  
643 et al. CLIMB-COVID: continuous integration supporting decentralised  
644 sequencing for SARS-CoV-2 genomic surveillance. *Genome Biol*. 2021 Jul  
645 1;22(1):196.
- 646 26. R Core Team. R: A language and environment for statistical computing. R  
647 Foundation for Statistical Computing, Vienna, Austria. [Internet]. 2019 [cited  
648 2023 Jan 17]. Available from: <https://www.r-project.org/>
- 649 27. Mateus ALP, Otete HE, Beck CR, Dolan GP, Nguyen-Van-Tam JS.  
650 Effectiveness of travel restrictions in the rapid containment of human influenza:  
651 a systematic review. *Bull World Health Organ*. 2014 Dec 1;92(12):868–880D.
- 652 28. Errett NA, Sauer LM, Rutkow L. An integrative review of the limited evidence on  
653 international travel bans as an emerging infectious disease disaster control  
654 measure. *J Emerg Manag*. 2020;18(1):7–14.
- 655 29. Gostic K, Gomez AC, Mummah RO, Kucharski AJ, Lloyd-Smith JO. Estimated  
656 effectiveness of symptom and risk screening to prevent the spread of COVID-  
657 19. *Elife*. 2020 Feb 24;9.
- 658 30. Quilty BJ, Clifford S, CMMID nCoV working group<sup>2</sup>, Flasche S, Eggo RM.  
659 Effectiveness of airport screening at detecting travellers infected with novel  
660 coronavirus (2019-nCoV). *Euro Surveill*. 2020 Feb;25(5).

661 31. Mandal S, Bhatnagar T, Arinaminpathy N, Agarwal A, Chowdhury A, Murhekar  
 662 M, et al. Prudent public health intervention strategies to control the coronavirus  
 663 disease 2019 transmission in India: A mathematical model-based approach.  
 664 Indian J Med Res. 2020;151(2 & 3):190–199.

665

666 **Tables**

667

668 **Table 1.** Frequency of international travel events across demographic and geographical  
 669 groups, during the period of the traffic light system (17th May 2021 to 26th September  
 670 2021) in Scotland.

| <b>Factor</b> | <b>Level</b>      | <b>Mean weekly travel events per 10,000 population</b> | <b>ANOVA test p-value*</b> | <b>Mean weekly cases among travellers per 10,000 population</b> | <b>ANOVA test p-value*</b> |
|---------------|-------------------|--------------------------------------------------------|----------------------------|-----------------------------------------------------------------|----------------------------|
| Age group     | 0-19y             | 5.98                                                   | p<0.001                    | 0.25                                                            | p<0.001                    |
|               | 20-39y            | 26.31                                                  |                            | 0.40                                                            |                            |
|               | 40-59y            | 21.69                                                  |                            | 0.29                                                            |                            |
|               | 60-79y            | 12.36                                                  |                            | 0.12                                                            |                            |
|               | 80y+              | 1.73                                                   |                            | 0.05                                                            |                            |
| Sex           | Male              | 17.29                                                  | p=0.731                    | 0.28                                                            | p=0.412                    |
|               | Female            | 16.13                                                  |                            | 0.24                                                            |                            |
| NHS Board**   | Greater Glasgow & | 18.42                                                  | p<0.001                    | 0.34                                                            | p=0.004                    |

|                                              |                            |       |         |      |         |
|----------------------------------------------|----------------------------|-------|---------|------|---------|
|                                              | Clyde                      |       |         |      |         |
|                                              | Lothian                    | 26.86 |         | 0.37 |         |
|                                              | Lanarkshire                | 11.93 |         | 0.27 |         |
|                                              | Grampian                   | 20.09 |         | 0.24 |         |
|                                              | Tayside                    | 14.11 |         | 0.23 |         |
|                                              | Fife                       | 14.61 |         | 0.22 |         |
|                                              | Ayrshire &<br>Arran        | 9.92  |         | 0.22 |         |
|                                              | Highland                   | 10.21 |         | 0.13 |         |
|                                              | Forth Valley               | 14.25 |         | 0.26 |         |
|                                              | Dumfries &<br>Galloway     | 5.66  |         | 0.12 |         |
|                                              | Borders                    | 9.50  |         | 0.20 |         |
|                                              | Western Isles              | 5.82  |         | 0.38 |         |
|                                              | Shetland                   | 6.33  |         | 0.00 |         |
|                                              | Orkney                     | 5.22  |         | 0.45 |         |
| Scottish Index<br>of Multiple<br>Deprivation | 1 (most<br>deprived)       | 10.02 | p<0.001 | 0.22 | p=0.166 |
|                                              | 2                          | 12.65 |         | 0.24 |         |
|                                              | 3                          | 15.49 |         | 0.21 |         |
|                                              | 4                          | 18.04 |         | 0.27 |         |
|                                              | 5 (least<br>deprived)      | 25.95 |         | 0.35 |         |
| Month                                        | May (17 <sup>th</sup> May) | 4.40  | p<0.001 | 0.04 | p<0.001 |

|  |                                                                |       |  |      |
|--|----------------------------------------------------------------|-------|--|------|
|  | - 6 <sup>th</sup> Jun<br>2021)                                 |       |  |      |
|  | June (7 <sup>th</sup> Jun<br>- 4 <sup>th</sup> Jul 2021)       | 7.27  |  | 0.09 |
|  | July (5 <sup>th</sup> Jul -<br>1 <sup>st</sup> Aug 2021)       | 14.09 |  | 0.26 |
|  | August (2 <sup>nd</sup><br>Aug - 5 <sup>th</sup> Sept<br>2021) | 24.56 |  | 0.43 |
|  | September<br>(6 <sup>th</sup> - 26 <sup>th</sup> Sept<br>2021) | 31.95 |  | 0.43 |

671 \*Test of difference in mean weekly travel events per 10,000 population

672 \*\* NHS Boards are ranked by population size from high-to-low

673

674

675

676

677

678

679

680

681

682 **Table 2.** Investigating risk factors for SARS-CoV-2 infection during the period of the  
 683 traffic light system (17th May 2021 to 30th September 2021) in Scotland.

| Factor           | Level                              | Number<br>(%) of<br>positive<br>events | Number (%)<br>of negative<br>events | Unadjusted<br>odds ratio<br>(95% CI, p-<br>value)* | Adjusted odds<br>ratio (95% CI, p-<br>value)** |
|------------------|------------------------------------|----------------------------------------|-------------------------------------|----------------------------------------------------|------------------------------------------------|
| Travel<br>status | No recent<br>travel                | 333,206<br>(99.8)                      | 1,457,766<br>(97.2)                 | Reference                                          | Reference                                      |
|                  | Travel to<br>green list<br>country | 62 (0.02)                              | 5,536 (0.4)                         | 0.06 (0.06,<br>0.07;<br>p<0.001)                   | 0.06 (0.05, 0.06;<br>p<0.001)                  |
|                  | Travel to<br>amber list<br>country | 463 (0.1)                              | 35,148 (2.3)                        | 0.07 (0.07,<br>0.07;<br>p<0.001)                   | 0.07 (0.07, 0.07;<br>p<0.001)                  |
|                  | Travel to<br>red list<br>country   | 16 (0.005)                             | 758 (0.05)                          | 0.10 (0.09,<br>0.12;<br>p<0.001)                   | 0.10 (0.09, 0.11;<br>p<0.001)                  |
| Age group        | 20-39y                             | 114,283<br>(34.2)                      | 442,182<br>(29.5)                   | Reference                                          | Reference                                      |
|                  | 0-19y                              | 111,775<br>(33.5)                      | 355,095<br>(23.7)                   | 1.34 (1.32,<br>1.35;<br>p<0.001)                   | 1.21 (1.19, 1.22;<br>p<0.001)                  |
|                  | 40-59y                             | 76,330                                 | 403,990                             | 0.74 (0.73,                                        | 0.73 (0.73, 0.74;                              |

|                   |           |                   |                   |                                  |                                |
|-------------------|-----------|-------------------|-------------------|----------------------------------|--------------------------------|
|                   |           | (22.9)            | (26.9)            | 0.75;<br>p<0.001)                | p<0.001)                       |
|                   | 60-79y    | 26,643<br>(8.0)   | 230,426<br>(15.4) | 0.46 (0.46,<br>0.47;<br>p<0.001) | 0.46 (0.45, 0.46;<br>p<0.001)  |
|                   | 80y+      | 4,716 (1.4)       | 67,515 (4.5)      | 0.30 (0.29,<br>0.31;<br>p<0.001) | 0.28, (0.28, 0.29;<br>p<0.001) |
| Sex               | Female    | 167,666<br>(50.2) | 830,303<br>(55.4) | Reference                        | Reference                      |
|                   | Male      | 166,081<br>(49.8) | 668,905<br>(44.6) | 1.21 (1.20,<br>1.22;<br>p<0.001) | 1.23 (1.22, 1.23;<br>p<0.001)  |
| Calendar<br>month | September | 122,729<br>(36.8) | 499,256<br>(33.3) | Reference                        | Reference                      |
|                   | May       | 6,716 (2.0)       | 98,475 (6.6)      | 0.32 (0.31,<br>0.32;<br>p<0.001) | 0.30 (0.29, 0.30;<br>p<0.001)  |
|                   | June      | 50,341<br>(15.1)  | 285,125<br>(19.0) | 0.80 (0.80,<br>0.81;<br>p<0.001) | 0.73 (0.72, 0.74;<br>p<0.001)  |
|                   | July      | 58,354<br>(17.5)  | 232,590<br>(15.5) | 1.04 (1.03,<br>1.05;<br>p<0.001) | 1.09 (1.08, 1.10;<br>p<0.001)  |
|                   | August    | 95,607            | 383,762           | 1.06 (1.05,                      | 1.06 (1.05, 1.07;              |

|                          |                    |                  |                   |                               |                               |
|--------------------------|--------------------|------------------|-------------------|-------------------------------|-------------------------------|
|                          |                    | (28.6)           | (25.6)            | 1.06;<br>p<0.001)             | p<0.001)                      |
| Deprivation (SIMD) score | 5 (least deprived) | 67,106<br>(20.1) | 318,304<br>(21.2) | Reference                     | Reference                     |
|                          | 1 (most deprived)  | 76,558<br>(22.9) | 299,429<br>(20.0) | 1.31 (1.30, 1.33;<br>p<0.001) | 1.13 (1.12, 1.14;<br>p<0.001) |
|                          | 2                  | 68,859<br>(20.6) | 292,631<br>(19.5) | 1.19 (1.18, 1.21;<br>p<0.001) | 1.10 (1.09, 1.12;<br>p<0.001) |
|                          | 3                  | 57,938<br>(17.4) | 279,730<br>(18.7) | 1.03 (1.02, 1.04;<br>p<0.001) | 1.03 (1.02, 1.05;<br>p<0.001) |
|                          | 4                  | 63,286<br>(19.0) | 309,114<br>(20.6) | 1.01 (0.99, 1.02;<br>p=2.92)  | 1.00 (0.99, 1.01;<br>p=0.748) |

684 \* Crude odds ratio estimated from single-level binary logistic regression models

685 \*\* Adjusted odds ratios from multivariable binary logistic regression model fitting a

686 random effect to control for health board location.

687

688

689

690

691



692 **Figures**

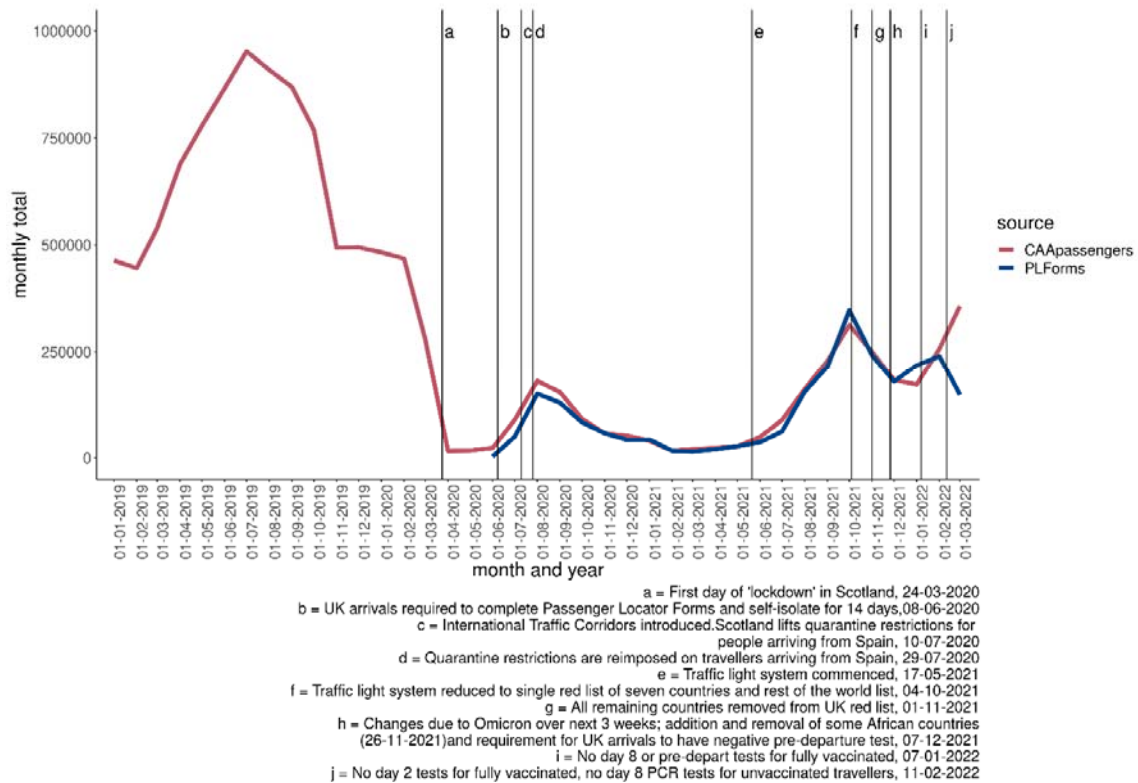

693

694 **Figure 1. Monthly numbers of passengers into Scotland, before and during the**  
 695 **pandemic January.** Data from Civil Aviation Authority data and Passenger Locator  
 696 forms spanning January 2019 to March 2022.

697

698

699

700

701

702

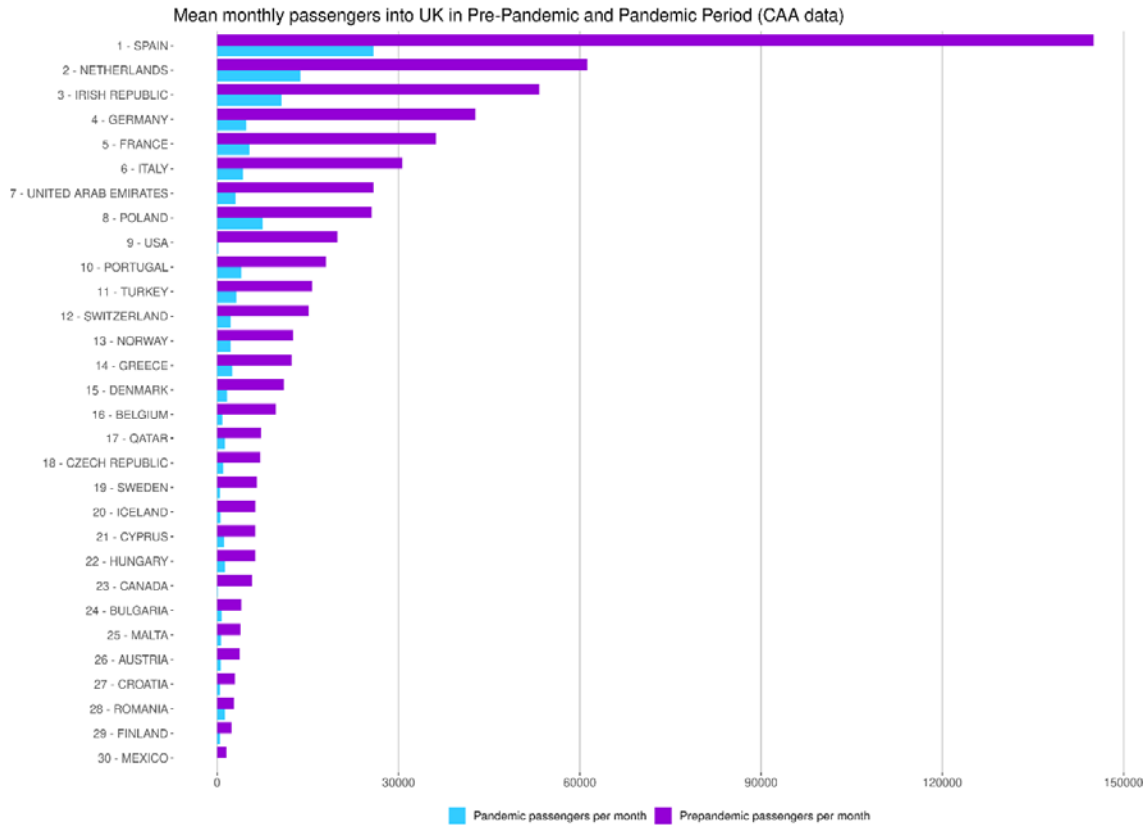

703

704 **Figure 2. Mean monthly number of passengers with Scottish residence**  
 705 **travelling into the UK.** Based on Civil Aviation Authority data comparing periods  
 706 before (January 2019 to February 2020) and during (March 2020 – March 2022) the  
 707 COVID-19 pandemic.

708

709

710

711

712

713

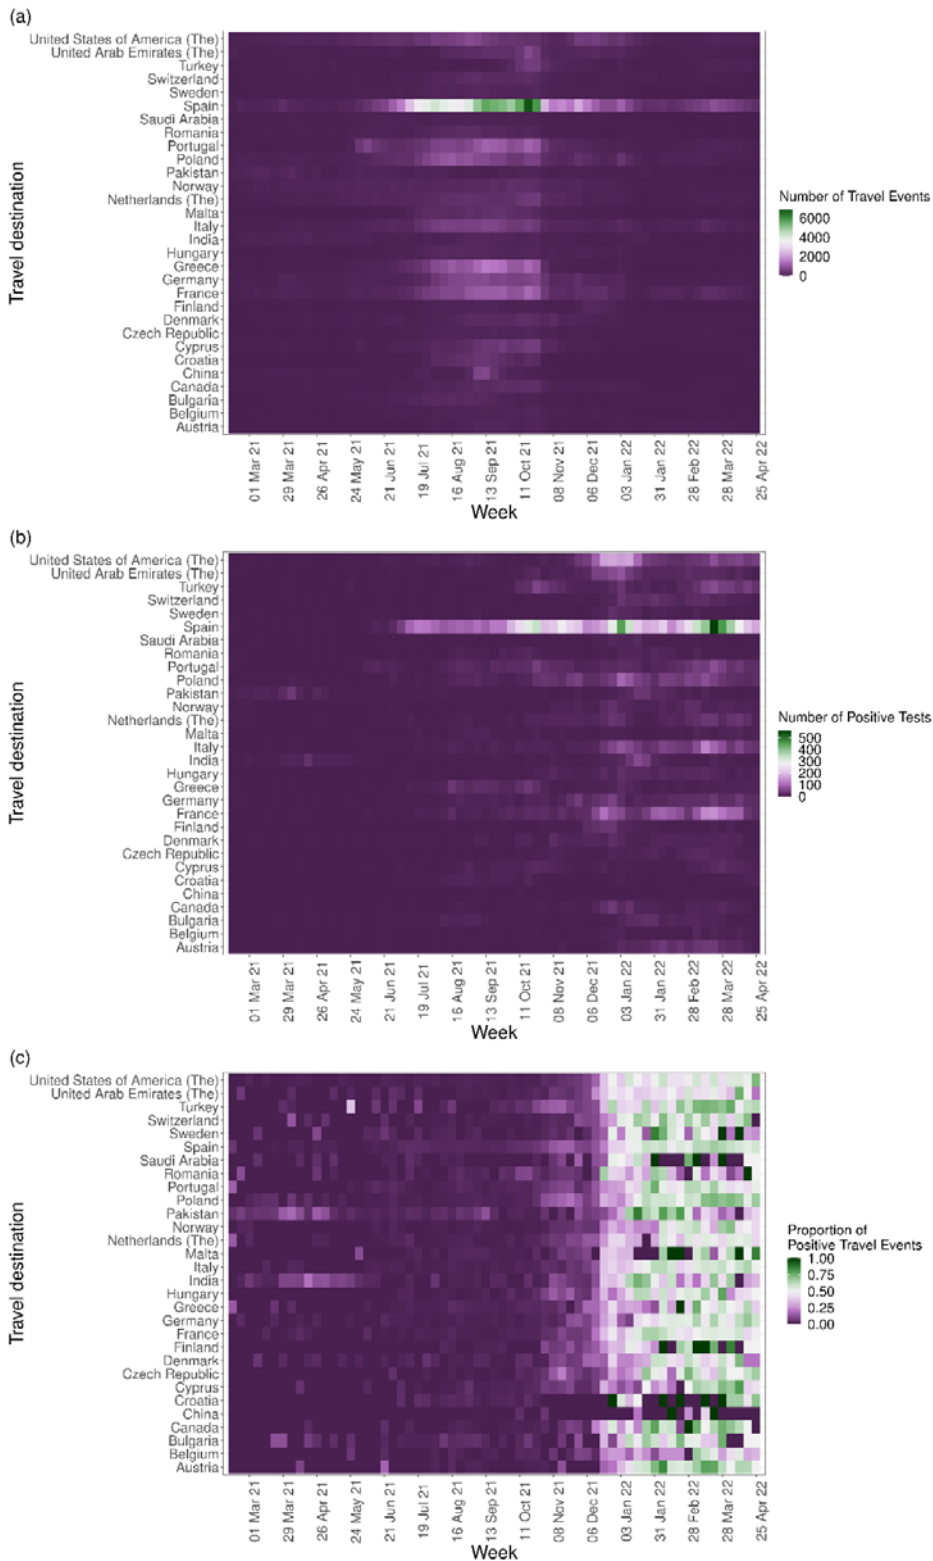

714

715 **Figure 3. Patterns of international travel and associated SARS-CoV-2 infections**  
 716 **in Scotland.** Weekly numbers of (a) international travel events among PCR-tested  
 717 individuals, (b) proportions testing SARS-CoV-2 positive, and (c) numbers testing  
 718 SARS-CoV-2 positive, spanning w/c 15<sup>th</sup> February 2021 to w/c 25<sup>th</sup> April 2022.

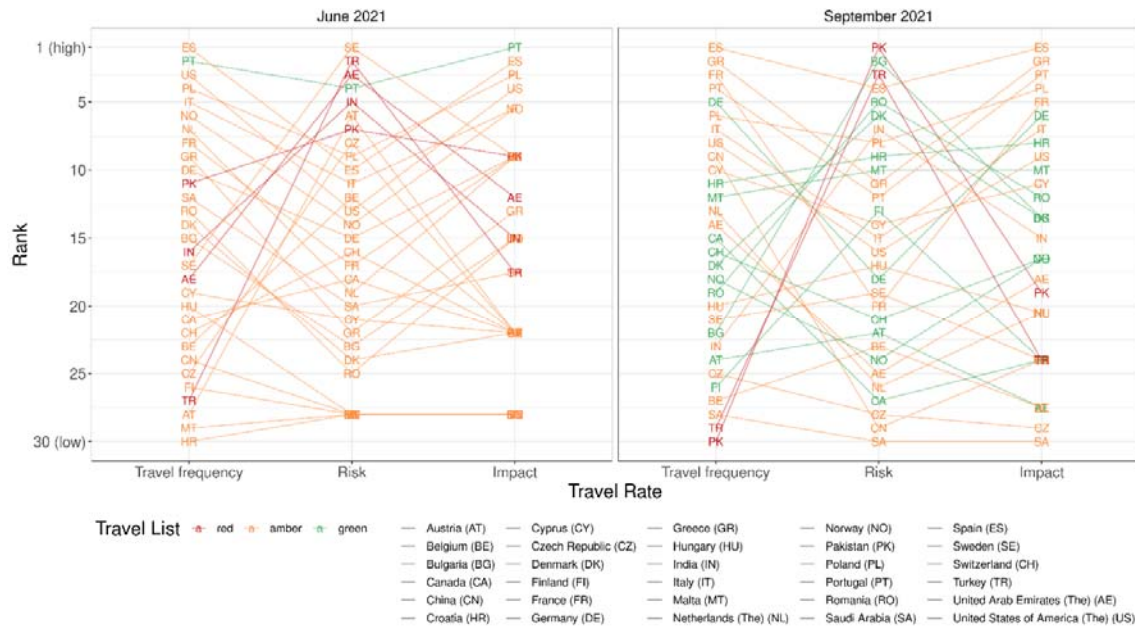

719

720 **Figure 4. Top 30 most frequently visited international travel destinations for**  
 721 **Scotland by risk and impact.** Travel frequency = the number of travel events to the  
 722 given destination; Risk = infection importation risk (as measured by the proportion of  
 723 PCR-confirmed SARS-CoV-2 cases among travel-related tests); Impact =  
 724 epidemiological impact (as measured by the proportion of Scottish cases of SARS-  
 725 CoV-2 associated with international travel).

726

727

728

729

730

731

732

733

734

735

736

737

738

739

740

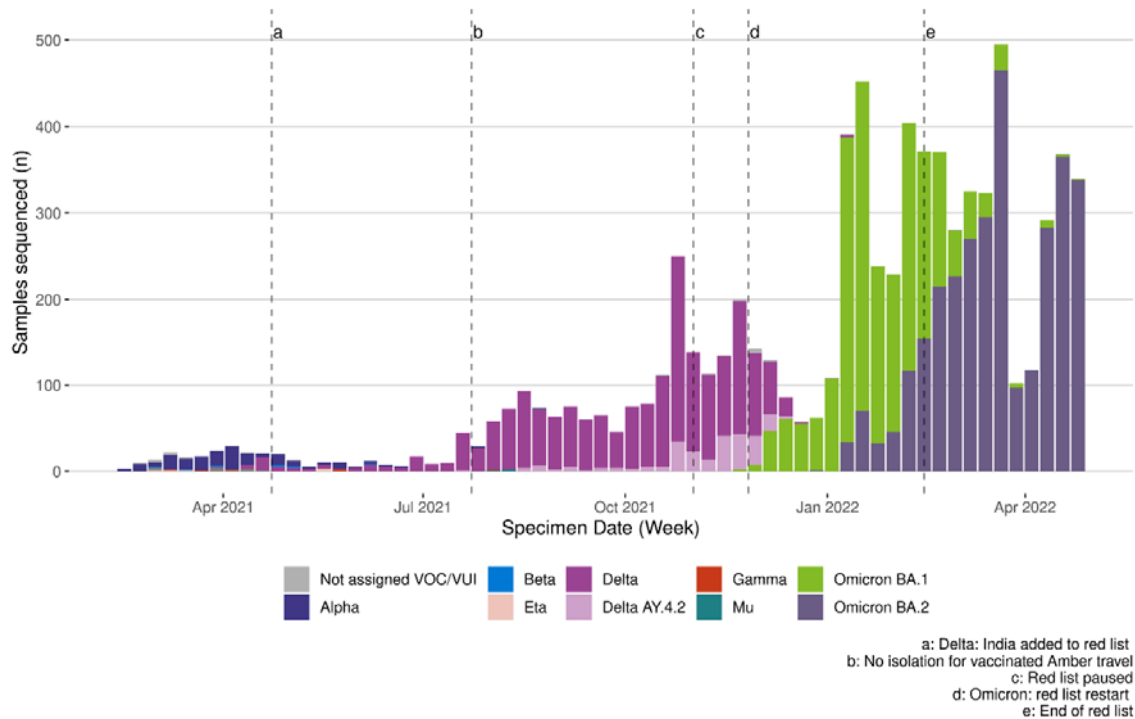

741

742 **Figure 5. Weekly count of PCR-confirmed cases undergoing whole genome**  
 743 **sequencing by SARS-CoV-2 variant type.**

744

745

746

747

748

749

750

751

752

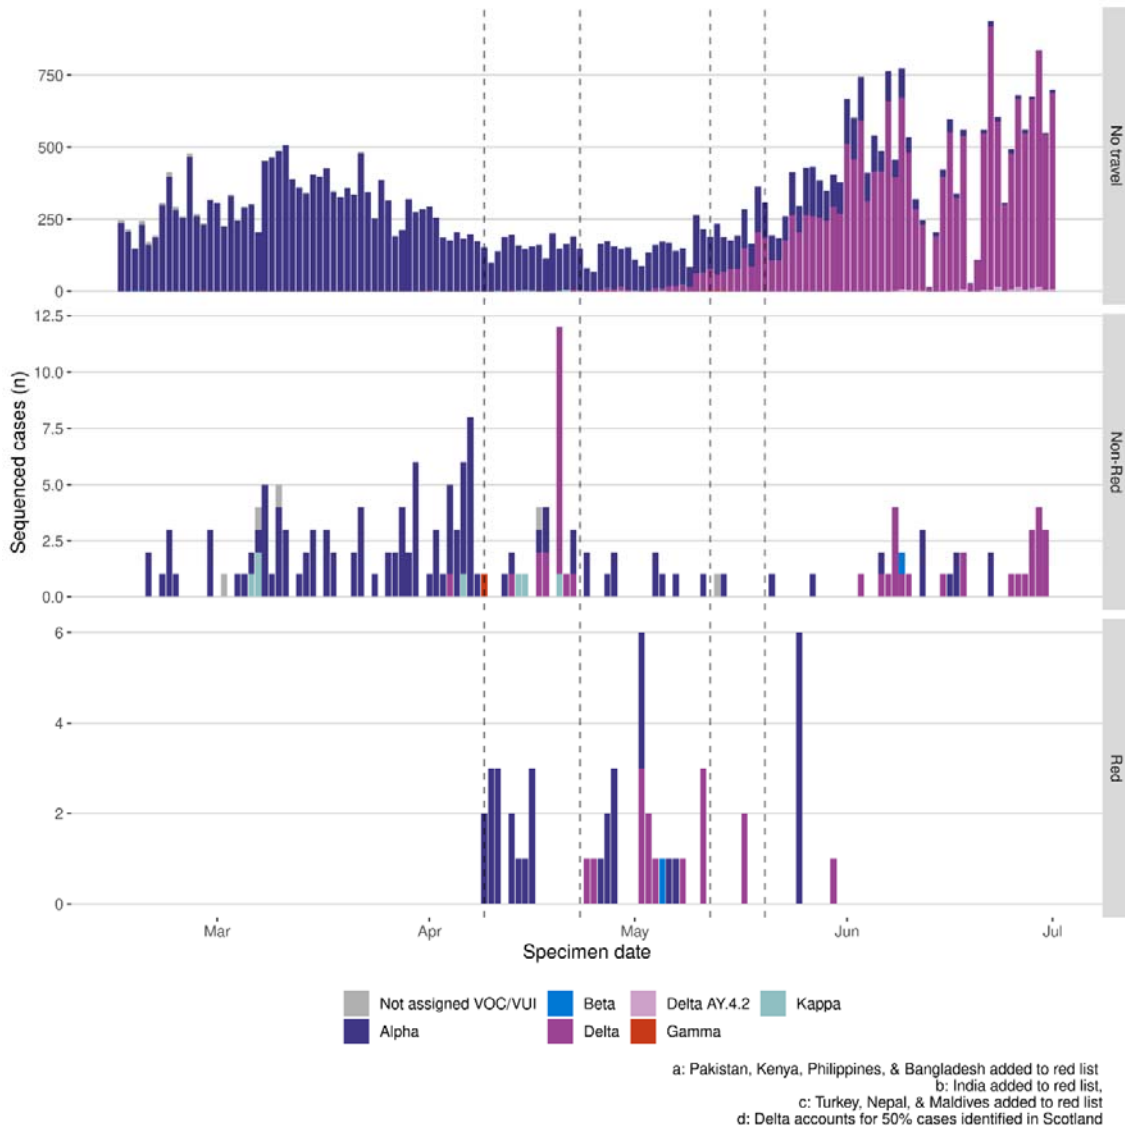

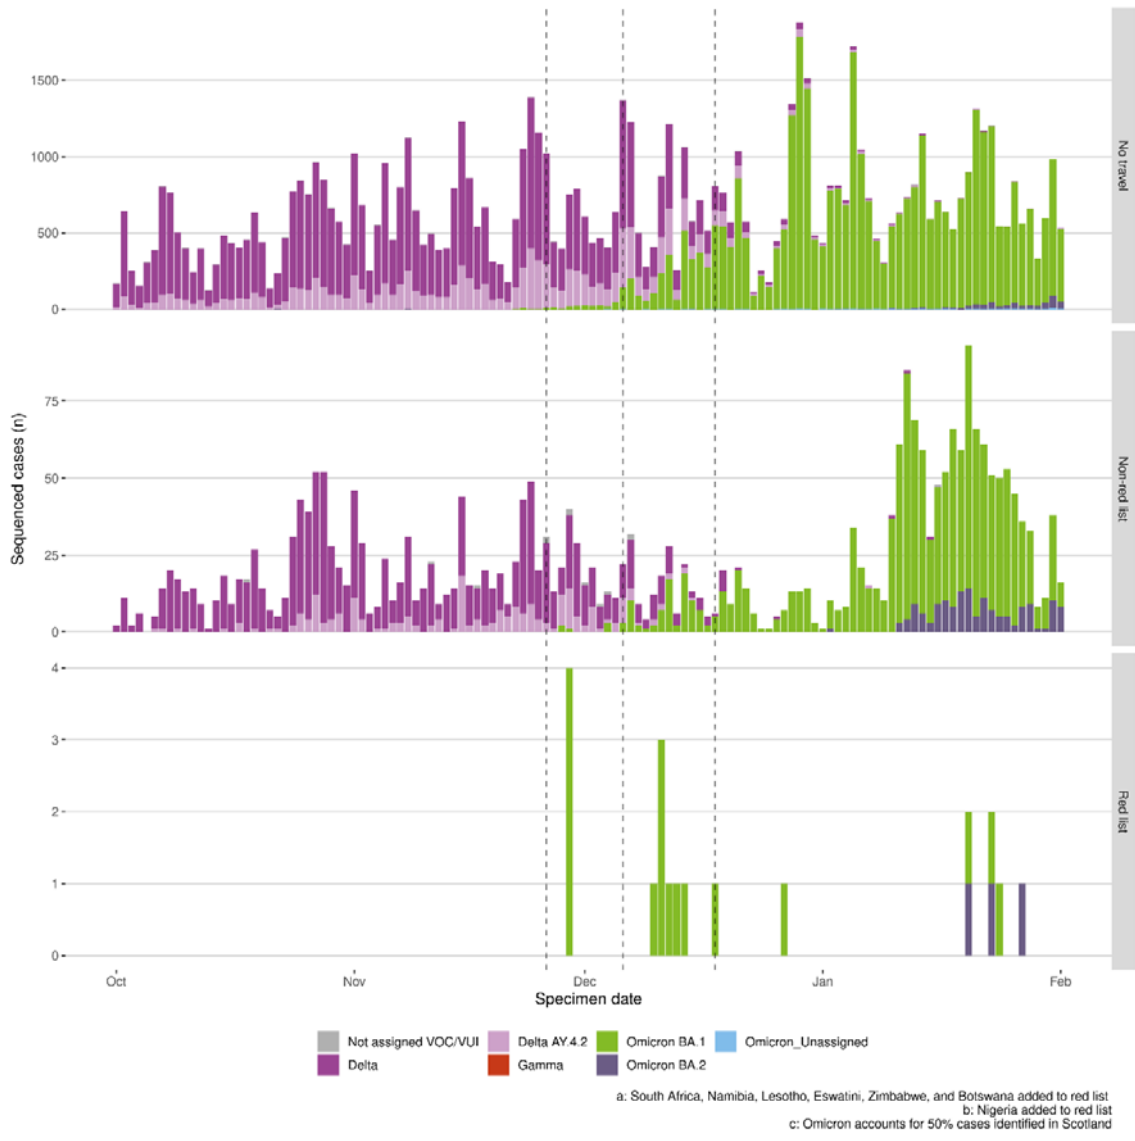

764

765 **Figure 7: Weekly count of whole genome sequenced SARS-CoV-2 cases during**  
 766 **period of Omicron variant emergence.** Numbers are shown among non-traveller  
 767 community cases (top panel), travellers returning from non-red destinations  
 768 (middle panel), and travellers returning from red-list travel destinations (bottom panel).

769

770

771

772
